# Supplementary material for: Benefits of Polymerase Chain Reaction Combined With Culture for the Diagnosis of Bone and Joint Infections: A Prospective Test Performance Study
Source: Oxford University Press journal article supplement (doi:10.1093/ofid/ofz511), 2019-12-01
Supplement: ofz511_suppl_supplementary_methods.doc [file ofz511_suppl_supplementary_methods.doc]

**Supplementary Methods: Inclusion Criteria**

- Patient are more than 18 years old
- Patient who do not declined to have his medical records reviewed for research

**Infectious Spondylodiscitis (IS) group**

Patients suspected of discitis and/or vertebral osteomyelitis were defined by the need of spinal biopsy in case of suspicion of infection. Spinal biopsies were justified by one or more clinical or imaging findings:

Clinical presentation

- Spinal pain unrelieved by rest
- Localized tenderness, neurological deficits or limited range of motion
- Fever > 38°C

Imaging findings (plain radiographs, MRI or CT):

- Erosions of end plates on adjacent vertebral bodies
- Decreased height of the intervertebral disk
- Presence of a nonvascularized zone suggesting presence of pus or necroses in intervertebral, epidural space or in paraspinal soft-tissues

**Prosthetic Joint Infection (PJI) group**

Patients suspected of prosthetic joint infection were defined by the need of surgical revision for diagnostic or therapeutic purposes in case of suspicion of infection. This revision was justified by one or more clinical, biological or imaging findings:

Clinical presentation

- Persistent joint pain
- Fever > 38°C
- Erythematous, swollen, fluctuant, and/or tender surgical wound
- Wound dehiscence
- Limited range of joint motion

Biological findings

- C-reactive protein > 10 mg/l
- Synovial fluid with leukocyte count > 1700/mm3 and polymorphonuclear leukocytes > 65%

Imaging findings

- Prosthesis loosening: periprosthetic osteolysis, progressive peri-prosthetic edging
- Scintigraphy using a technetium (Tc99m) scan, gallium citrate (Ga67) scan, or indium (In111)-labeled leukocyte showing fixation around the prosthesis.

**Septic arthritis (SA) group**

- Patients suspected of septic arthritis without prosthesis were defined by the need of synovial punction and/or biopsy justified by one or more clinical, biological or imaging findings:

Clinical presentation

- Acute joint pain and/or swelling
- Adenopathy near inflammatory joint
- Fever > 38°C

Biological findings

- White Blood Cells > 10 G/L
- C-reactive protein > 10 mg/L
- Synovial fluid with leukocyte count > 2000/mm3 or polymorphonuclear leukocytes > 90%

Imaging findings:

- Capsular and surrounding soft-tissues swelling
- Synovial notch and/or demineralization
- Periarticular abscess

**Exclusion criteria:**

- Patients already included in this study
- Patient without health insurance
- Antibiotic treatment before sampling was not an exclusion criterion

**Exclusion criteria for control groups:**

Patient with one or more criteria:

- Suspicion of concomitant infection defined by a fever >38°C and C-reactive protein >10 mg/L
- Arthrosis treated by infiltration in the 6 months preceding inclusion
- Rapidly progressive arthrosis, prosthesis loosening or bone necrosis presumed to be aseptic
- Patients with prior spinal instrumentation or surgery
