# Supplementary material for: Benefits of Polymerase Chain Reaction Combined With Culture for the Diagnosis of Bone and Joint Infections: A Prospective Test Performance Study
Source: Oxford University Press journal article supplement (doi:10.1093/ofid/ofz511), 2019-12-01
Supplement: ofz511_suppl_supplementary_table_1.doc [file ofz511_suppl_supplementary_table_1.doc]

Supplementary Table 1. Distribution of patients and characteristics of their samples.

|  |  | All Bone and Joint Infections | |  | Infectious spondylodiscitis | |  | Septic Arthritis | | |  | Prosthetic Joint Infections | |
| --- | --- | --- | --- | --- | --- | --- | --- | --- | --- | --- | --- | --- | --- |
|  |  | Infected | Control |  | Infected | Control |  | Infected | Control |  | | Infected | Control |
| Patients |  | 105 | 111 |  | 51 | 32 |  | 26 | 43 | |  | 28 | 36 |
| Samples (n) |  | 308 | 245 |  | 174 | 77 |  | 44 | 58 | |  | 90 | 110 |
| Samples (mean+/-SD) |  | 2.9 +/- 1.3 | 2.2 +/- 1.3 |  | 3.4 +/- 0.9 | 2.4 +/- 1.3 |  | 1.7 +/- 0.9 | 1.3 +/- 0.8 | |  | 3.2 +/- 1.3 | 3.1 +/- 1.3 |
| Tissues n (%) |  | 232 (75) | 170 (69) |  | 152 (87) | 72 (94) |  | 14 (32) | 10 (17) | |  | 66 (73) | 88 (80) |
| Tissues (mean+/-SD) |  | 2.2 +/- 1.5 | 1.5 +/- 1.5 |  | 3 +/- 0.9 | 2.3 +/- 1.1 |  | 0.5 +/- 1 | 0.2 +/- 0.7 | |  | 2.4 +/- 1.4 | 2.4 +/- 1.4 |
| Fluids n (%) |  | 76 (25) | 75 (31) |  | 22 (13) | 5 (6) |  | 30 (68) | 48 (83) | |  | 24 (27) | 22 (20) |
| Fluids (mean+/-SD) |  | 0.7 +/- 0.8 | 0.7 +/- 0.8 |  | 0.4 +/- 0.7 | 0.2 +/- 0.5 |  | 1.2 +/- 0.8 | 1.1 +/- 0.6 | |  | 0.9 +/- 0.8 | 0.6 +/- 0.8 |
