# Supplementary material for: Benefits of Polymerase Chain Reaction Combined With Culture for the Diagnosis of Bone and Joint Infections: A Prospective Test Performance Study
Source: Oxford University Press journal article supplement (doi:10.1093/ofid/ofz511), 2019-12-01
Supplement: ofz511_suppl_supplementary_table_3.doc [file ofz511_suppl_supplementary_table_3.doc]

Supplementary Table 3. Clinical characteristics of infected and control patients

|  | |  | All Bone and Joint Infections | | | |  | Infectious spondylodiscitis | | | | | |  | Septic Arthritis | | | | | | |  | Prosthetic Joint Infections | | | | | |
| --- | --- | --- | --- | --- | --- | --- | --- | --- | --- | --- | --- | --- | --- | --- | --- | --- | --- | --- | --- | --- | --- | --- | --- | --- | --- | --- | --- | --- |
|  | |  | Infected  n=105 (%) | | Controls  n=111 (%) | P value |  | Infected  n=51(%) | Controls  n=32(%) | | | P value | |  | Infected  n=26(%) | | | Controls  n=43(%) | | P value | |  | Infected  n=28(%) | | | Controls  n=36(%) | | P value |
| *Risk factors of infection* | |  |  | |  |  |  |  |  | | |  | |  |  | | |  | |  | |  |  | | |  | |  |
| Congenital immunodeficiency | |  | 2 (2.2) | | 1 (1.0) | 0.60 |  | 0 (0) | 0 (0) | | | 1.00 | |  | 2 (8.3) | | | 1 (2.3) | | 0.29 | |  | 0(0) | | | 0(0) | | 1.00 |
| Rheumatoid arthritis | |  | 3 (5.5) | | 7 (11.9) | 0.33 |  | 0 (0.0) | 1 (5.0) | | | 0.44 | |  | NDa | | | ND | | ND | |  | 2 (15.4) | | | 2 (14.3) | | 1.00 |
| Chronic renal failure | |  | 7 (13) | | 5 (9.6) | 0.59 |  | 3 (13.0) | 3 (18.0) | | | 0.67 | |  | 2 (11.1) | | | 2 (8.7) | | 1.00 | |  | 2 (15.4) | | | 0 (0.0) | | 0.22 |
| Cirrhosis | |  | 7 (13) | | 5 (9.6) | 0.59 |  | 3 (13.0) | 3 (18.0) | | | 0.67 | |  | 2 (11.1) | | | 2 (8.7) | | 1.00 | |  | 2 (15.4) | | | 0 (0.0) | | 0.22 |
| Alcoholism | |  | 4 (4.4) | | 2 (2.4) | 0.68 |  | 2 (4.9) | 1 (4.2) | | | 1.00 | |  | 1 (4.2) | | | 1 (4.0) | | 1.00 | |  | 1 (3.8) | | | 0 (0.0) | | 0.43 |
| Intravenous drug abuse | |  | 3 (3.3) | | 0 (0.0) | 0.25 |  | 3 (7.3) | 0 (0.0) | | | 0.29 | |  | 0 (0.0) | | | 0 (0.0) | | 0.98 | |  | 0(0) | | | 0(0) | | 0.24 |
| Diabetes mellitus | |  | 16 (27.1) | | 13 (20.6) | 0.40 |  | 7 (29.2) | 4 (25.0) | | | 1.00 | |  | 4 (20.0) | | | 4 (17.4) | | 1.00 | |  | 5 (33.3) | | | 5 (20.8) | | 0.46 |
| Long-term use of corticosteroids | |  | 6 (10.3) | | 13 (21.0) | 0.14 |  | 1 (4.0) | 5 (23.8) | | | 0.08 | |  | ND | | | ND | | ND | |  | 2 (14.3) | | | 3 (16.7) | | 1.00 |
| Immunosuppressive medication | |  | 4 (7.0) | | 7 (11.7) | 0.37 |  | 0 (0.0) | 3 (14.3) | | | 0.09 | |  | 3 (15.8) | | | 5 (21.7) | | 0.70 | |  | 1 (8.3) | | | 1 (5.9) | | 1.00 |
| Anticancer medication | |  | 2 (3.6) | | 3 (5.1) | 0.83 |  | 1 (4.2) | 3 (14.3) | | | 0.33 | |  | 0 (0.0) | | | 0 (0.0) | | 0.85 | |  | 1 (7.7) | | | 0 (0.0) | | 0.43 |
| *Localization* |  | |  |  | |  |  |  | |  |  | |  | | |  |  | |  | |  | | |  |  | |  | |
| Cervical spine | |  | NAb | | NA | NA |  | 7 (13.7) | 1 (3.1) | | | 0.36 | |  | NA | | | NA | | NA | |  | NA | | | NA | | NA |
| Thoracic | |  | NA | | NA | NA |  | 17 (33.3) | 11 (34.4) | | | NA | |  | NA | | | NA | | NA | |  | NA | | | NA | | NA |
| Lombar | |  | NA | | NA | NA |  | 21 (41.2) | 14 (43.8) | | | NA | |  | NA | | | NA | | NA | |  | NA | | | NA | | NA |
| Sacrum | |  | NA | | NA | NA |  | 3 (5.9) | 5 (15.6) | | | NA | |  | NA | | | NA | | NA | |  | NA | | | NA | | NA |
| Sacro-iliac joint | |  | NA | | NA | NA |  | 3 (5.9) | 1 (3.1) | | | NA | |  | NA | | | NA | | NA | |  | NA | | | NA | | NA |
| Knee | |  | NA | | NA | NA |  | NA | NA | | | NA | |  | 12 (46.2) | | | 39 (90.7) | | <0.01 | |  | 13 (46.4) | | | 16 (44.4) | | 0.70 |
| Hip | |  | NA | | NA | NA |  | NA | NA | | | NA | |  | 4 (15.4) | | | 1 (2.3) | | NA | |  | 13 (46.4) | | | 19 (52.8) | | NA |
| Elbow | |  | NA | | NA | NA |  | NA | NA | | | NA | |  | 5 (19.2) | | | 0 (0) | | NA | |  | 1 (3.6) | | | 0 (0) | | NA |
| Shoulder | |  | NA | | NA | NA |  | NA | NA | | | NA | |  | 2 (7.7) | | | 1 (2.3) | | NA | |  | 0 (0) | | | 0 (0) | | NA |
| Others | |  | NA | | NA | NA |  | NA | NA | | | NA | |  | 3 (11.5) | | | 2 (4.7) | | NA | |  | 1 (3.6) | | | 1 (2.8) | | NA |

aND : not determined;

bNA : not applicable
