# Supplementary material for: Benefits of Polymerase Chain Reaction Combined With Culture for the Diagnosis of Bone and Joint Infections: A Prospective Test Performance Study
Source: Oxford University Press journal article supplement (doi:10.1093/ofid/ofz511), 2019-12-01
Supplement: ofz511_suppl_supplementary_table_4.doc [file ofz511_suppl_supplementary_table_4.doc]

Supplementary Table 4. Clinical and biological characteristics of patients with spondylodiscitis

|  | **Control Cases (N=32)**  **(group 1)** | **Tuberculous vertebral osteomyelitis (N=16)**  **(group 2)** | **Pyogenic Vertebral osteomyelitis (N=35)**  **(group 3)** | *global P* value | *P* value  1 *vs* 3 | *P* value  1 *vs* 2 | *P* value  2 *vs* 3 |
| --- | --- | --- | --- | --- | --- | --- | --- |
| Characteristics |  |  |  |  |  |  |  |
| Mean Age (years, SD) | 63.8 ± 11.4 | 50.0 ± 21.1 | 62.7 ± 14.6 | <0.01 0.1591 0.0002 0.0060 | 0.1591 0.0002 0.0060 | <0.01 | <0.01 |
| Female gender | 15 (46.9%) | 5 (31.3%) | 11 (31.4%) | 0.36 |  |  |  |
| Fever > 38°C | 1 (4.5%) | 4 (33.3%) | 7 (25.9%) | 0.04 | 0.06 | 0.04 | 0.71 |
| Night sweats, n(%) | 0 (0.0%) | 3 (25.0%) | 5 (14.7%) | 0.02 | 0.06 | 0.02 | 0.41 |
| Loss of weight> 5% in two months, n (%) | 7 (24.1%) | **8 (61.5%)** | **7 (20.6%)** | **0.02 0.7693 0.0352 0.0131** | 0.77 0.7693 0.0352 0.0131 | 0.03 0.7693 0.0352 0.0131 | **0.01** |
| Localization |  |  |  |  |  |  |  |
| Cervical spine | 14 (43.8%) | 7 (43.8%) | 14 (40.0%) | 0.67 |  |  |  |
| Thoracic | 11 (34.4%) | 4 (25.0%) | 13 (37.1%) |  |  |  |  |
| Lombar | 1 (3.1%) | 3 (18.8%) | 4 (11.4%) |  |  |  |  |
| Sacrum | 5 (15.6%) | 1 (6.3%) | 2 (5.7%) |  |  |  |  |
| Sacro-iliac joint | 1 (3.1%) | 1 (6.3%) | 2 (5.7%) |  |  |  |  |
| Biology |  |  |  |  |  |  |  |
| Mean Serum CRPa (mg/L) | 32.1 ± 46.3 | **35.9 ± 34.6** | **88.3 ± 62.5** | **<0.01** | <0.01 | 0.36 | **<0.01** |
| Mean ESRb (mm/hr) | 36.6 ± 39.6 | 39.4 ± 25.3 | 66.7 ± 30.2 | 0.01 | <0.01 | 0.52 | 0.10 |
| Mean Blood leukocyte count (G/L) | 7.7 ± 2.6 | 5.6 ± 1.7 | 8.5 ± 3.8 | <0.01 | 0.32 | 0.01 | <0.01 |
| Histology of biopsy displaying granulomatous inflammatory changes, n(%) | 1 (3.1%) | 12 (75.0%) | 0 (0.0%) | <0.01 | 0.48 | <0.01 | <0.01 |

aCRP: C-reactive protein; normal value < 5 mg/L;

bESR: Erythrocyte sedimentation rate, normal value 5-20 mm/h
