# Supplementary material for: Benefits of Polymerase Chain Reaction Combined With Culture for the Diagnosis of Bone and Joint Infections: A Prospective Test Performance Study
Source: Oxford University Press journal article supplement (doi:10.1093/ofid/ofz511), 2019-12-01
Supplement: ofz511_suppl_supplementary_table_5.doc [file ofz511_suppl_supplementary_table_5.doc]

Supplementary Table 5. Microorganisms involved in bone and joint infections according to the expert committee

|  | **All BJIa,b** | | | | | **ISa,b** | | | | | **SAa,b** | | | | | **PJIa,b** | | | | |
| --- | --- | --- | --- | --- | --- | --- | --- | --- | --- | --- | --- | --- | --- | --- | --- | --- | --- | --- | --- | --- |
|  | **total(%)** | **culture+   PCR+** | **culture+ PCR-** | **culture- PCR +** | **culture-  PCR-** | **total(%)** | **culture+ PCR+** | **culture+ PCR-** | **culture- PCR+** | **culture- PCR-** | **total(%)** | **culture+ PCR+** | **culture+ PCR-** | **culture- PCR+** | **culture - PCR-** | **total(%)** | **culture+ PCR +** | **culture+ PCR -** | **culture- PCR+** | **culture- PCR-** |
| *Staphylococci* | **32(30)** | **24** | **7** |  | **1** | **10(20)** | **8** | **2** |  |  | **10(38)** | **7** | **2** |  | **1** | **12(43)** | **9** | **3** |  |  |
| *S. aureus* | 24 | 19 | 4 |  | 1d | 8 | 7 | 1 |  |  | 9 | 6 | 2 |  | 1 | 7 | 6 | 1 |  |  |
| *S. epidermidis* | 7 | 4 | 3 |  |  | 2 | 1 | 1 |  |  |  |  |  |  |  | 5 | 3 | 2 |  |  |
| *S. lugdunensis* | 1 | 1 |  |  |  |  |  |  |  |  | 1 | 1 |  |  |  |  |  |  |  |  |
| *Streptococci* | **15(14)** | **9** | **2** | **3** | **1** | **7(14)** | **4** | **2** | **1** |  | **3(12)** | **2** |  | **1** |  | **5(18)** | **3** |  | **1** | **1** |
| *S. pneumoniae* | 4 | 1 |  | 3 |  | 1 |  |  | 1 |  | 2 | 1 |  | 1 |  | 1 |  |  | 1 |  |
| *S. agalactiae* | 3 | 2 | 1 |  |  | 2 | 1 | 1 |  |  |  |  |  |  |  | 1 | 1 |  |  |  |
| *S. anginosus* | 2 | 2 |  |  |  | 1 | 1 |  |  |  | 1 | 1 |  |  |  |  |  |  |  |  |
| *Aerococcus urinae* | 1 |  |  |  | 1d |  |  |  |  |  |  |  |  |  |  | 1 |  |  |  | 1 |
| *Granulicatella adiacens* | 1 | 1 |  |  |  |  |  |  |  |  |  |  |  |  |  | 1 | 1 |  |  |  |
| *S. bovis* | 1 | 1 |  |  |  | 1 | 1 |  |  |  |  |  |  |  |  |  |  |  |  |  |
| *S. crispatus* | 1 | 1 |  |  |  | 1 | 1 |  |  |  |  |  |  |  |  |  |  |  |  |  |
| *S. equisimilis* | 1 | 1 |  |  |  |  |  |  |  |  |  |  |  |  |  | 1 | 1 |  |  |  |
| *S. gordonae* | 1 |  | 1 |  |  | 1 |  | 1 |  |  |  |  |  |  |  |  |  |  |  |  |
| *Enterobacteriaceae* | **8(8)** | **8** |  |  |  | **2(4)** | **2** |  |  |  | **2(8)** | **2** |  |  |  | **4(14)** | **4** |  |  |  |
| *Proteus mirabilis* | 1 | 1 |  |  |  |  |  |  |  |  |  |  |  |  |  | 1 | 1 |  |  |  |
| *Salmonella typhimurium* | 1 | 1 |  |  |  |  |  |  |  |  | 1 | 1 |  |  |  |  |  |  |  |  |
| *Enterobacter cloacae* | 2 | 2 |  |  |  |  |  |  |  |  | 1 | 1 |  |  |  | 1 | 1 |  |  |  |
| *Escherichia coli* | 4 | 4 |  |  |  | 2 | 2 |  |  |  |  |  |  |  |  | 2 | 2 |  |  |  |
| *Mycoplasma* | **4(4)** | **2** |  | **2** |  |  |  |  |  |  | **2(8)** |  |  | **2** |  | **2(7)** | **2** |  |  |  |
| *Mycoplasma hominis* | 2 | 2 |  |  |  |  |  |  |  |  |  |  |  |  |  | 2 | 2 |  |  |  |
| *Mycoplasma penetrans* | 1 |  |  | 1 |  |  |  |  |  |  | 1 |  |  | 1 |  |  |  |  |  |  |
| *Ureaplasma spp.* | 1 |  |  | 1 |  |  |  |  |  |  | 1 |  |  | 1 |  |  |  |  |  |  |
| *Anaerobic* | **5(5)** | **4** | **1** |  |  | **4(8)** | **3** | **1** |  |  |  |  |  |  |  | **1(4)** | **1** |  |  |  |
| *Propionibacterium acnes* | 2 | 2 |  |  |  | 2 | 2 |  |  |  |  |  |  |  |  |  |  |  |  |  |
| *Micromonas micros* | 2 | 1 | 1 |  |  | 2 | 1 | 1 |  |  |  |  |  |  |  |  |  |  |  |  |
| *Bacteroides vulgatus* | 1 | 1 |  |  |  |  |  |  |  |  |  |  |  |  |  | 1 | 1 |  |  |  |
| *Candida albicans* | **3(3)** |  | **3** |  |  | **3(6)** |  | **3** |  |  |  |  |  |  |  |  |  |  |  |  |
| *Miscellanous* | **9(9)** | **5** | **2** | **1** | **1** | **5(10)** | **4** |  | **1** |  | **2(8)** | **1** |  |  | **1** | **2(7)** |  | **2** |  |  |
| *Neisseria gonorrhoeae* | 2 | 1 |  |  | 1d |  |  |  |  |  | 2 | 1 |  |  | 1 |  |  |  |  |  |
| *Pseudomonas aeruginosa* | 1 | 1 |  |  |  | 1 | 1 |  |  |  |  |  |  |  |  |  |  |  |  |  |
| *Haemophilus aphrophilus* | 1 | 1 |  |  |  | 1 | 1 |  |  |  |  |  |  |  |  |  |  |  |  |  |
| *Brucella melitensis* | 1 | 1 |  |  |  | 1 | 1 |  |  |  |  |  |  |  |  |  |  |  |  |  |
| *Enterococcus* spp. | 1 |  |  | 1 |  | 1 |  |  | 1 |  |  |  |  |  |  |  |  |  |  |  |
| *Corynebacterium striatum* | 1 | 1 |  |  |  | 1 | 1 |  |  |  |  |  |  |  |  |  |  |  |  |  |
| *E. faecalis + E. coli* | 1 |  | 1 |  |  |  |  |  |  |  |  |  |  |  |  | 1 |  | 1 |  |  |
| *E. faecalis +  S. epidermidis* | 1 |  | 1 |  |  |  |  |  |  |  |  |  |  |  |  | 1 |  | 1 |  |  |
| *Unknown* | **9(9)** |  |  |  | **9**d | **4(8)** |  |  |  | **4** | **3(12)** |  |  |  | **3** | **2(7)** |  |  |  | **2** |
| *Total pyogenic microorganisms* | 85(81) | 52 | 15 | 6 | 12 | 35(69) | 21 | 8 | 2 | 4 | 22(85) | 12 | 2 | 3 | 5 | 28 (100) | 19 | 5 | 1 | 3 |
| *M. tuberculosisc* | **20(19)** | **5** | **3** | **6** | **2**d | **16(31)** | **5** | **3** | **6** | **2** | **4(15)** |  |  |  |  | **0** |  |  |  |  |
| Total | 105 | 57 | 18 | 12 | 14 | 51 | 26 | 11 | 8 | 6 | 26 | 12 | 2 | 3 | 5 | 28 | 19 | 5 | 1 | 3 |

aBJI : bone and joint infections, IS: infectious spondylodiscitis, SA: septic arthritis, PJI : prosthesis joint infection

bPCR correspond to 16S-PCR for all pyogenic microorganisms and specific PCR for *M. tuberculosis*.

cFor septic arthritis, the diagnosis of *M. tuberculosis* has been done by culture only

dFor culture – PCR -, etiology was based on the following documentation : *S. aureus* and *A. urinae* were evidenced after inoculation of articular fluid in a blood culture bottle, *N. gonorrhoeae* by Abbott RealTime CT/NG assay, and *M. tuberculosis* on the basis of clinical, MRI and histological arguments. Nine patients were considered infected by the expert committee on a beam of arguments but without microbiological documentation.
